# Supplementary material for: Analysis of progression-free survival of first-line tyrosine kinase inhibitors in patients with non-small cell lung cancer harboring leu858Arg or exon 19 deletions
Source: PubMed Central journal article supplement (PMC5352060; doi:10.18632/oncotarget.13815), 2016-12-07
Supplement: oncotarget-08-1343-s001.pdf [file oncotarget-08-1343-s001.pdf]

## Analysis of progression-free survival of first-line tyrosine kinase inhibitors in patients with non-small cell lung cancer harboring leu858Arg or exon 19 deletions

### Supplementary Materials

**Supplementary Table S1: Methods of EGFR mutation analysis among first-line TKI users**

|                                        | EGFR-TKIs |         |           |         |          |         |
|----------------------------------------|-----------|---------|-----------|---------|----------|---------|
|                                        | Gefitinib |         | Erlotinib |         | Afatinib |         |
|                                        | n         | (%)     | n         | (%)     | n        | (%)     |
| Total                                  | 304       |         | 63        |         | 81       |         |
| Testing method                         |           |         |           |         |          |         |
| Competitive allele-specific TaqMan PCR | 48        | (15.8%) | 10        | (15.9%) | 9        | (11.1%) |
| PCR/direct sequencing                  | 149       | (49.0%) | 24        | (38.1%) | 18       | (22.2%) |
| Scorpions & ARMS                       | 95        | (31.3%) | 29        | (46.0%) | 53       | (65.4%) |
| Nil*                                   | 12        | (3.9%)  | 0         | (0%)    | 1        | (1.2%)  |

\*patient receive EGFR mutation analysis in another hospital.

**Supplementary Table S2: Distribution of EGFR compound mutations among first-line TKI users**

| EGFR mutations |              | EGFR-TKIs                                                         |                                                                 |                                                                                           |
|----------------|--------------|-------------------------------------------------------------------|-----------------------------------------------------------------|-------------------------------------------------------------------------------------------|
|                |              | Gefitinib                                                         | Erlotinib                                                       | Afatinib                                                                                  |
| Exon 18        | Substitution | 4<br>(E709G, E709K, E709V,<br>Q701L)                              | 0                                                               | 0                                                                                         |
|                | Polymorphism | 1<br>(2421 G/A polymorphism)                                      | 0                                                               | 0                                                                                         |
| Exon 19        | Insertions   | 12                                                                | 2                                                               | 3                                                                                         |
|                | Substitution | 1<br>(G729A)                                                      | 1<br>(G747S)                                                    | 0                                                                                         |
|                | Polymorphism | 1<br>(2469 C/T polymorphism)                                      | 0                                                               | 0                                                                                         |
| Exon 20        | Substitution | 5<br>(R776H, R776C, S768I,<br>T790M, T790M)                       | 3<br>(E804K, T790M, T790M)                                      | 2<br>(T790M, T790M)                                                                       |
|                | Polymorphism | 44<br>(2703 G/A polymorphism x2,<br>2607 G/A polymorphism<br>x42) | 6<br>(2361 G/A polymorphism<br>x1,<br>2607 G/A polymorphism x5) | 8<br>(2361 G/A polymorphism x3,<br>2364 C/T polymorphism x1,<br>2607 G/A polymorphism x4) |
| Exon 21        | Substitution | 2<br>(L833V, V834L)                                               | 0                                                               | 0                                                                                         |

**Supplementary Table S3: Multivariable analysis of progression-free survival in patients received afatinib or gefitinib**

| Subgroup                  | Gefitinib (n) |          | Afatinib (n) |          | HR (95% CI) <sup>a</sup> | P <sub>interaction</sub> |
|---------------------------|---------------|----------|--------------|----------|--------------------------|--------------------------|
|                           | Events        | Patients | Events       | Patients |                          |                          |
| EGFR mutation             |               |          |              |          |                          | 0.443                    |
| Del19                     | 102           | 148      | 17           | 48       | 0.54 (0.32–0.90)         |                          |
| L858R                     | 97            | 156      | 8            | 33       | 0.38 (0.18–0.80)         |                          |
| Baseline brain metastases |               |          |              |          |                          | 0.589                    |
| Absence                   | 157           | 244      | 20           | 64       | 0.59 (0.37–0.95)         |                          |
| Presence                  | 42            | 60       | 5            | 17       | 0.42 (0.16–1.05)         |                          |
| ECOG PS                   |               |          |              |          |                          | 0.300                    |
| 0 & 1                     | 147           | 231      | 19           | 70       | 0.46 (0.28–0.74)         |                          |
| > 1                       | 52            | 73       | 6            | 11       | 0.78 (0.31–1.97)         |                          |
| Sex                       |               |          |              |          |                          | 0.580                    |
| Men                       | 74            | 114      | 11           | 39       | 0.44 (0.23–0.83)         |                          |
| Women                     | 125           | 190      | 14           | 42       | 0.52 (0.30–0.92)         |                          |
| Age (years)               |               |          |              |          |                          | 0.856                    |
| < 65                      | 109           | 154      | 16           | 52       | 0.52 (0.30–0.88)         |                          |
| ≥ 65                      | 90            | 150      | 9            | 29       | 0.47 (0.23–0.96)         |                          |
| Smoking                   |               |          |              |          |                          | 0.172                    |
| Never                     | 143           | 226      | 21           | 63       | 0.61 (0.38–0.96)         |                          |
| Current or ever           | 56            | 78       | 4            | 18       | 0.29 (0.11–0.81)         |                          |
| Overall                   | 199           | 304      | 25           | 81       | 0.51 (0.34–0.78)         |                          |

Abbreviations: ECOG PS, Eastern Cooperative Oncology Group performance status; HR, hazard ratio.

<sup>a</sup>Multivariable analysis is by Cox proportional hazards model. Adjusted for covariate factors, including age, sex, smoking, EGFR mutation, baseline brain metastases, and ECOG PS.

**Supplementary Table S4: Multivariable analysis of progression-free survival in patients received erlotinib or gefitinib**

| Subgroup                  | Gefitinib (n) |          | Erlotinib (n) |          | HR (95% CI) <sup>a</sup> | P <sub>interaction</sub> |
|---------------------------|---------------|----------|---------------|----------|--------------------------|--------------------------|
|                           | Events        | Patients | Events        | Patients |                          |                          |
| EGFR mutation             |               |          |               |          |                          | 0.096                    |
| Del19                     | 102           | 148      | 8             | 27       | 0.34 (0.16–0.70)         |                          |
| L858R                     | 97            | 156      | 14            | 36       | 0.79 (0.45–1.39)         |                          |
| Baseline brain metastases |               |          |               |          |                          | 0.504                    |
| Absence                   | 157           | 244      | 18            | 52       | 0.56 (0.34–0.92)         |                          |
| Presence                  | 42            | 60       | 4             | 11       | 0.69 (0.24–2.01)         |                          |
| ECOG PS                   |               |          |               |          |                          | 0.473                    |
| 0 & 1                     | 147           | 231      | 19            | 56       | 0.53 (0.33–0.86)         |                          |
| >1                        | 52            | 73       | 3             | 7        | 0.66 (0.20–2.20)         |                          |
| Sex                       |               |          |               |          |                          | 0.778                    |
| Men                       | 74            | 114      | 8             | 24       | 0.55 (0.26–1.15)         |                          |
| Women                     | 125           | 190      | 14            | 39       | 0.58 (0.33–1.02)         |                          |
| Age (years)               |               |          |               |          |                          | 0.802                    |
| <65                       | 109           | 154      | 14            | 34       | 0.60 (0.34–1.06)         |                          |
| ≥65                       | 90            | 150      | 8             | 29       | 0.52 (0.25–1.08)         |                          |
| Smoking                   |               |          |               |          |                          | 0.492                    |
| Never                     | 143           | 226      | 15            | 48       | 0.52 (0.31–0.90)         |                          |
| Current or ever           | 56            | 78       | 7             | 15       | 0.67 (0.30–1.51)         |                          |
| Overall                   | 199           | 304      | 22            | 63       | 0.57 (0.37–0.89)         |                          |

Abbreviations: ECOG PS, Eastern Cooperative Oncology Group performance status; HR, hazard ratio.

<sup>a</sup>Multivariable analysis is by Cox proportional hazards model. Adjusted for covariate factors, including age, sex, smoking, EGFR mutation, baseline brain metastases, and ECOG PS.
